# Supplementary material
Source: PubMed Central journal article supplement (PMC4655513)

## WNV Arrival Years

2002 - 2005

2002 -  
2003

1999 - 2001

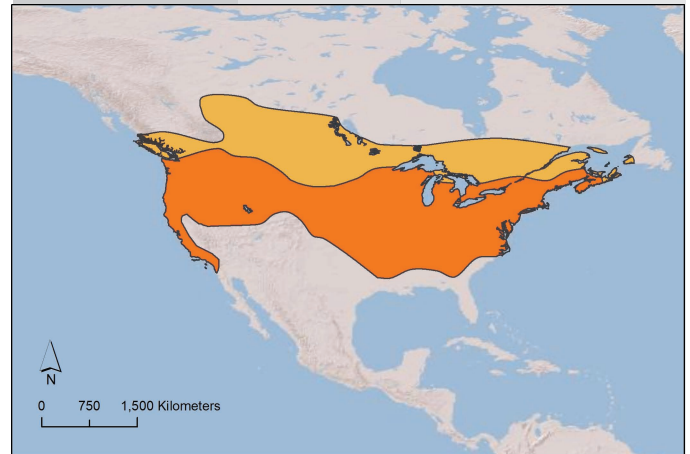

### American Goldfinch

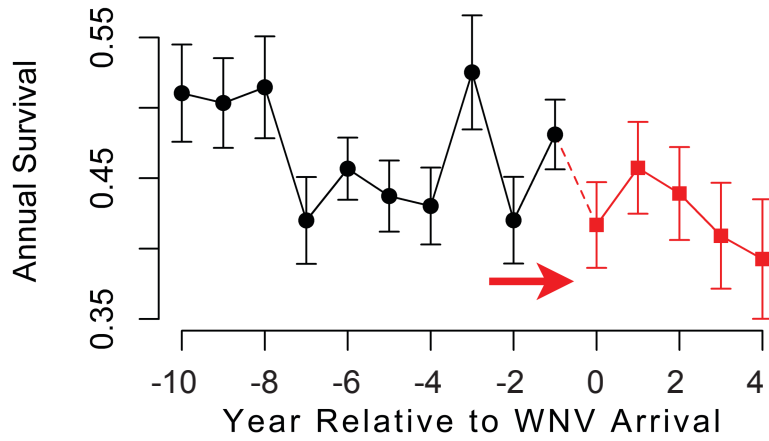

### Black-headed Grosbeak

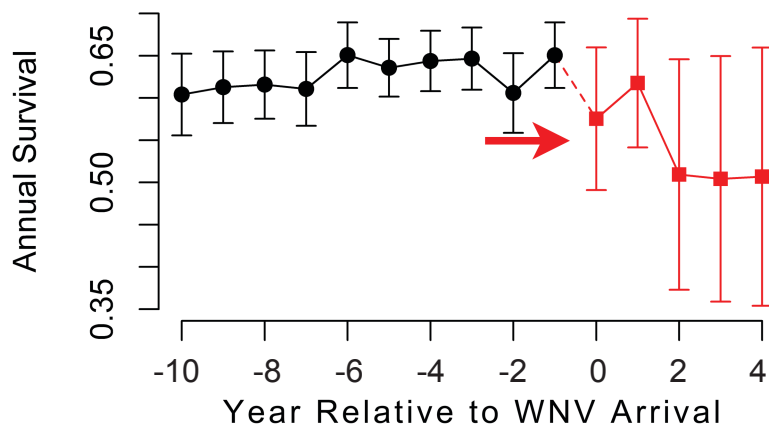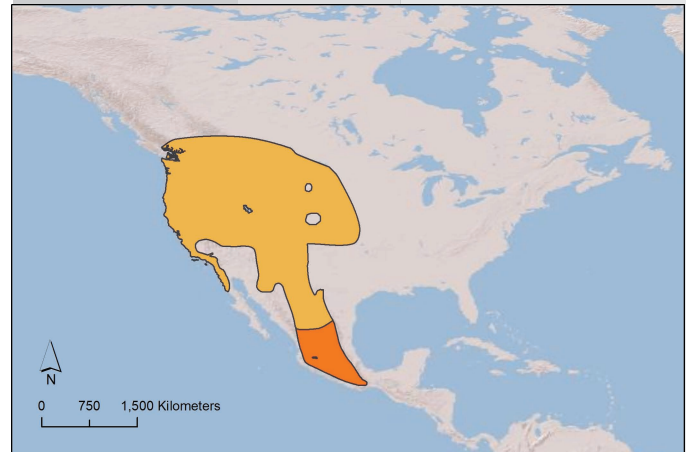

### Eastern Towhee

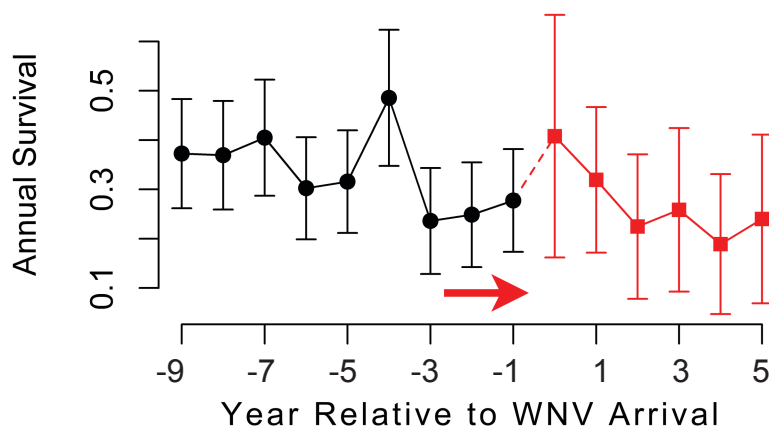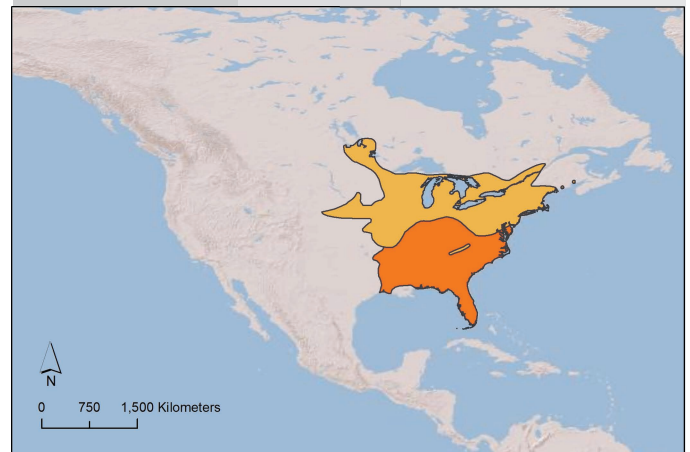

# WNV Arrival Years

## Gray Catbird

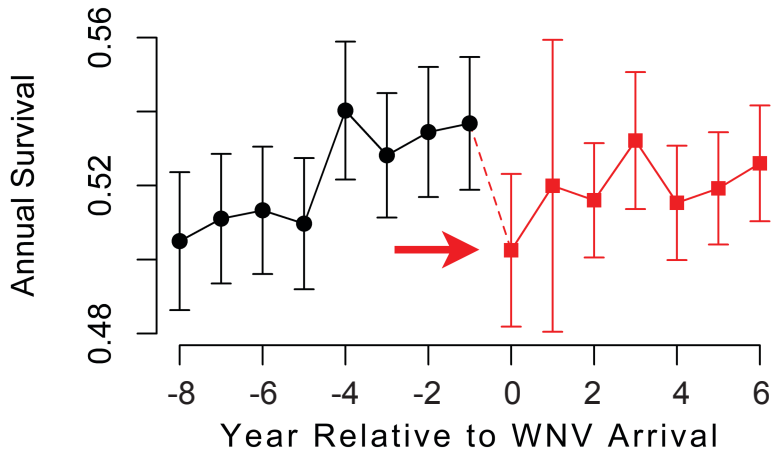

2002 - 2005

2002 - 2003

1999 - 2001

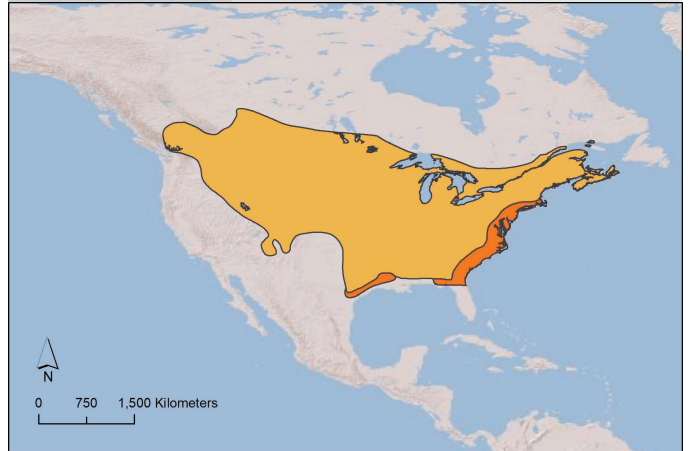

## Ovenbird

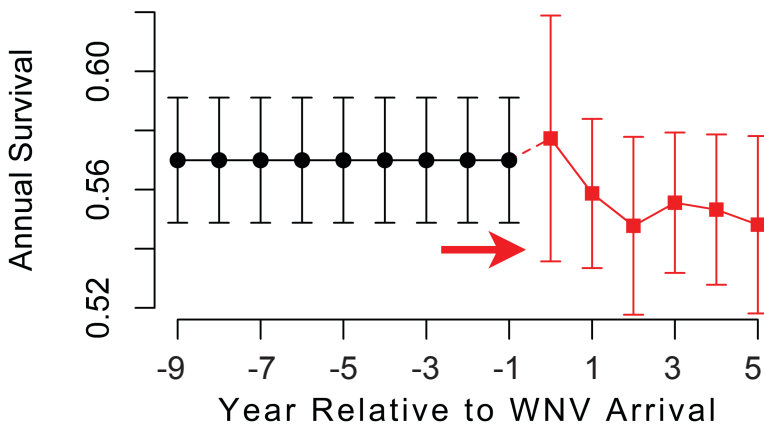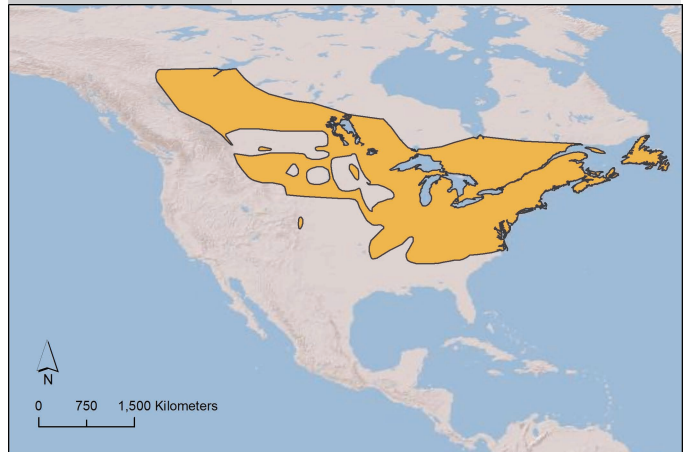

## Purple Finch

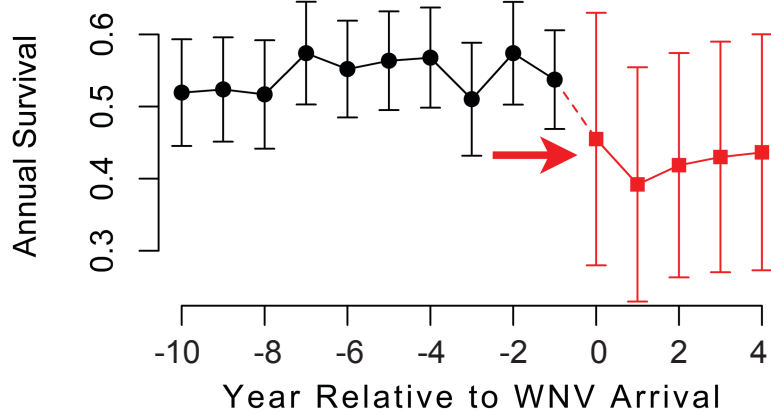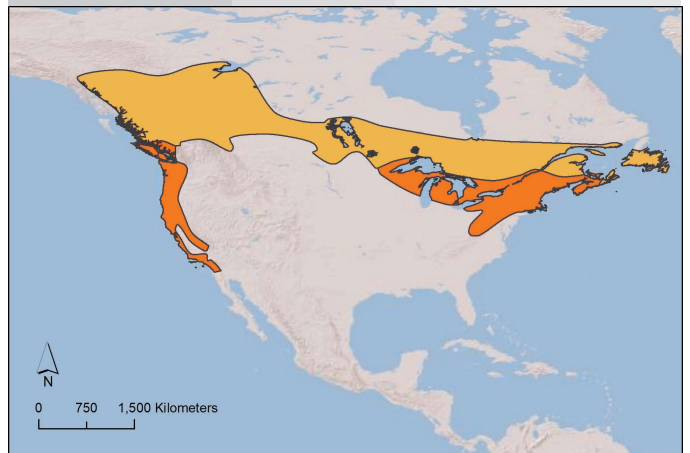

## WNV Arrival Years

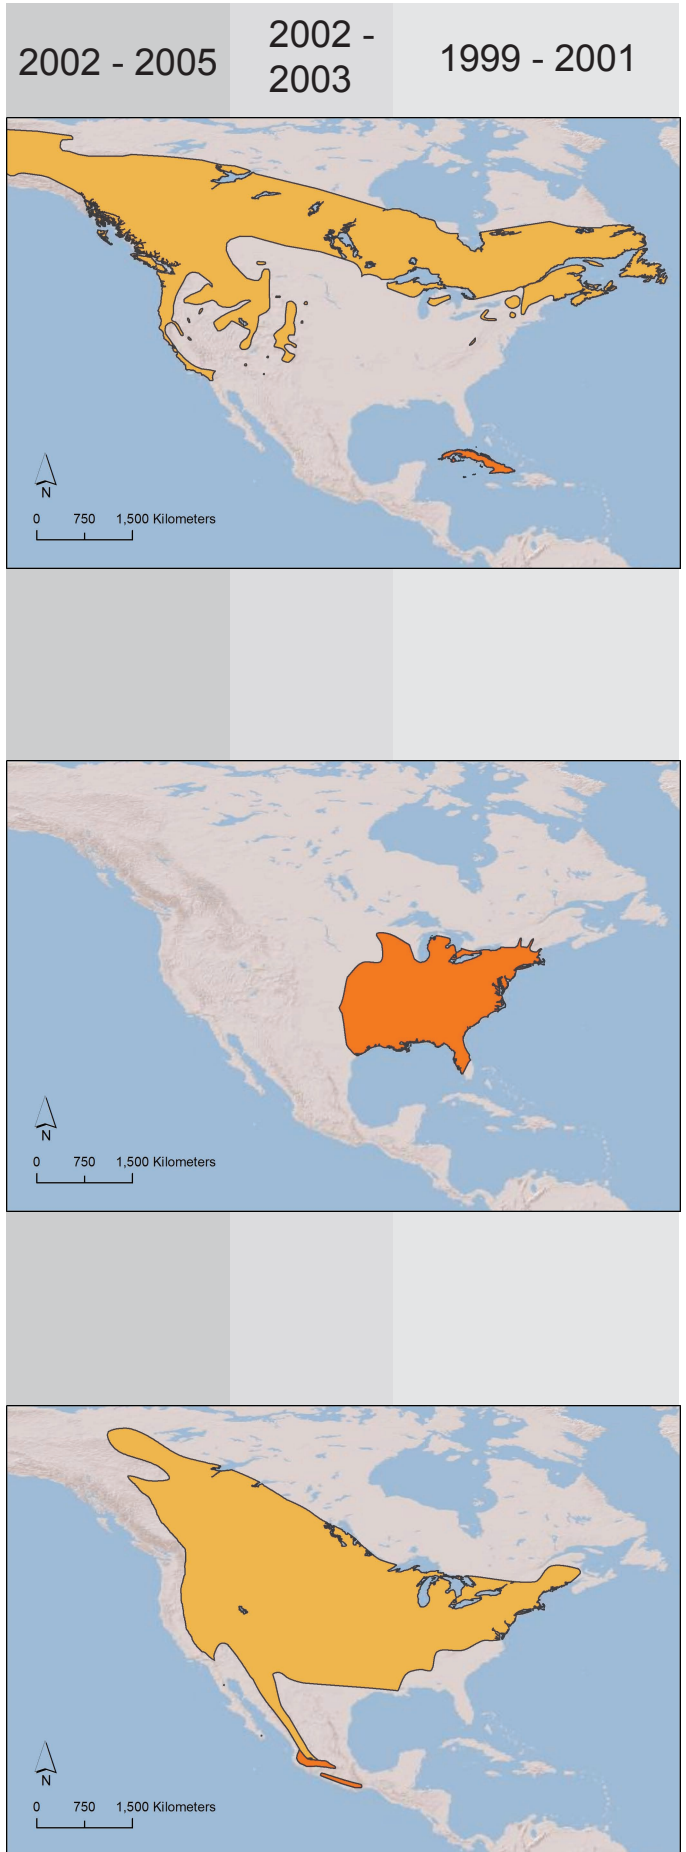

### Swainson's Thrush

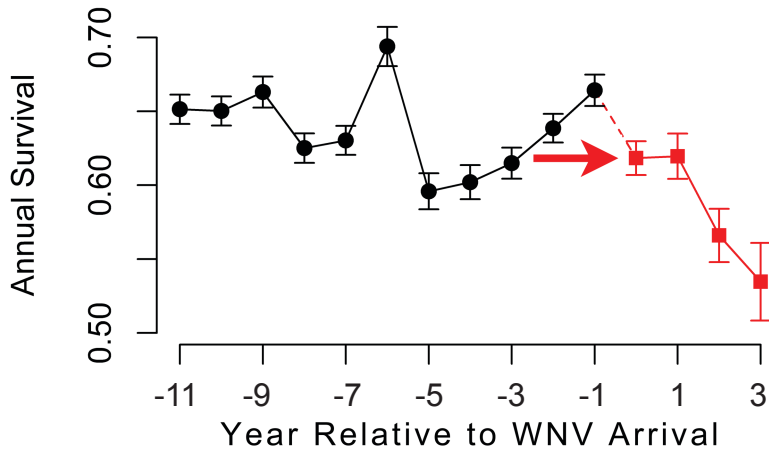

### Tufted Titmouse

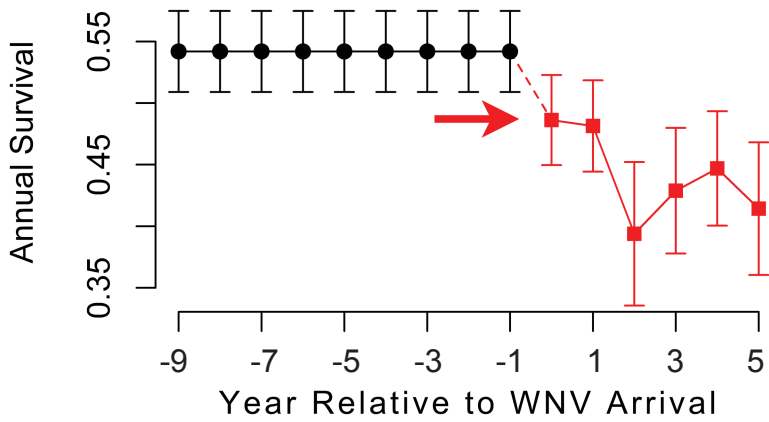

### Warbling Vireo

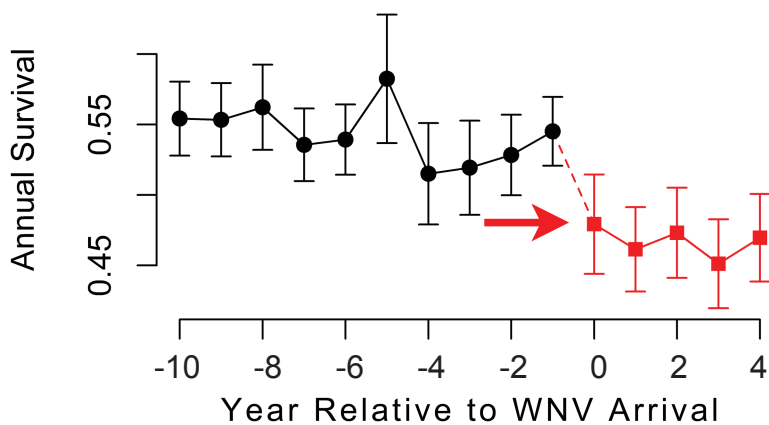

# WNV Arrival Years

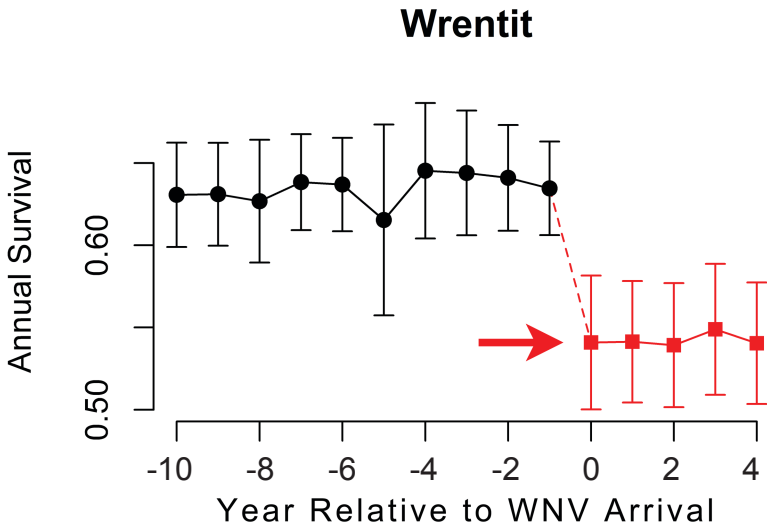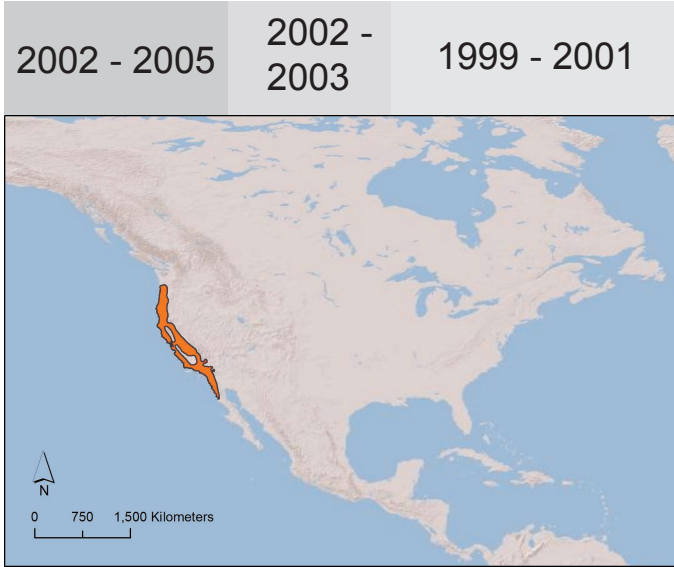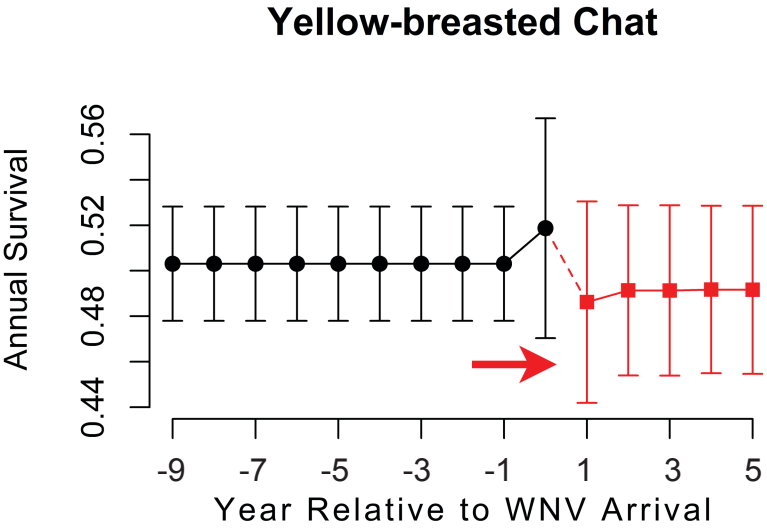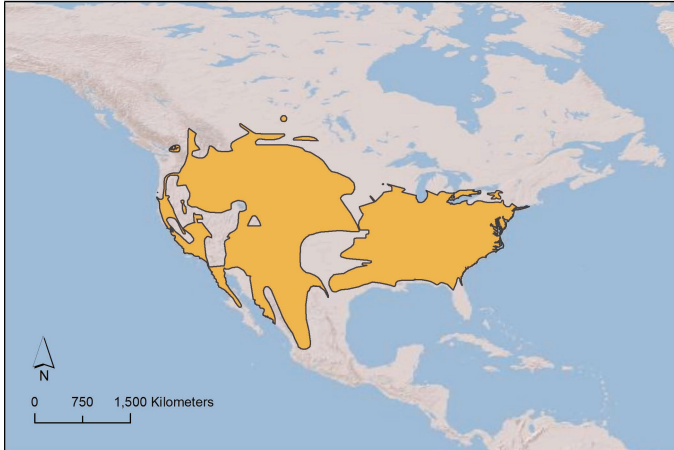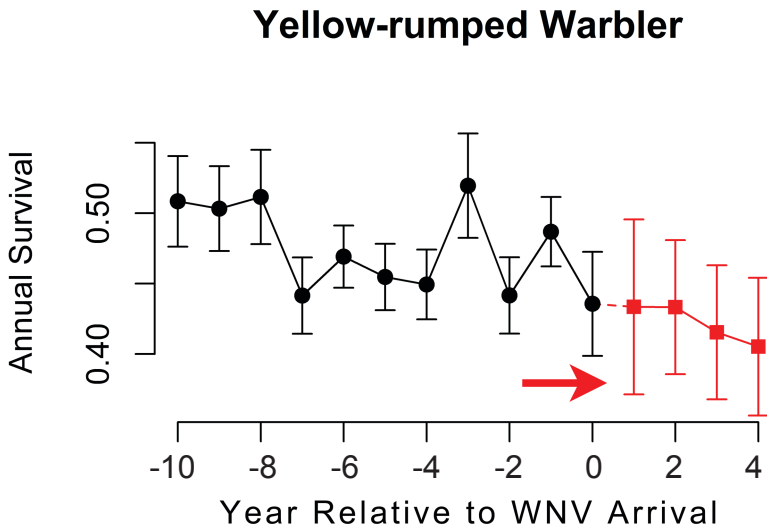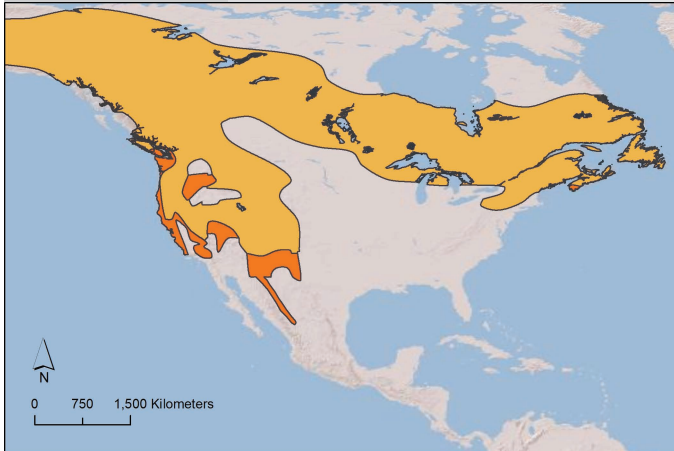

## WNV Arrival Years

### Carolina Wren

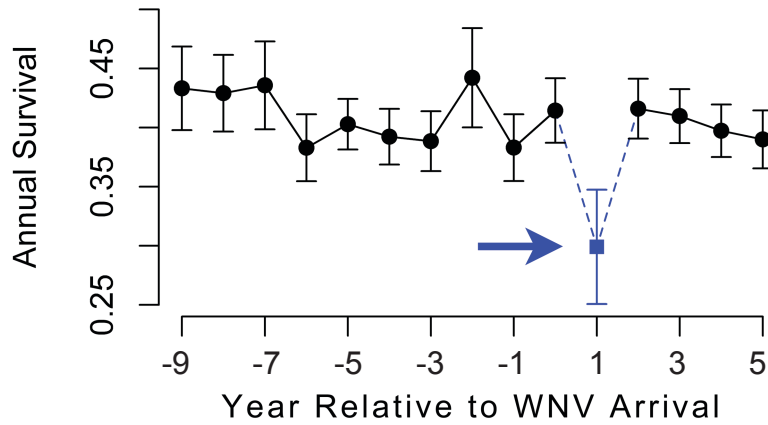

### Downy Woodpecker

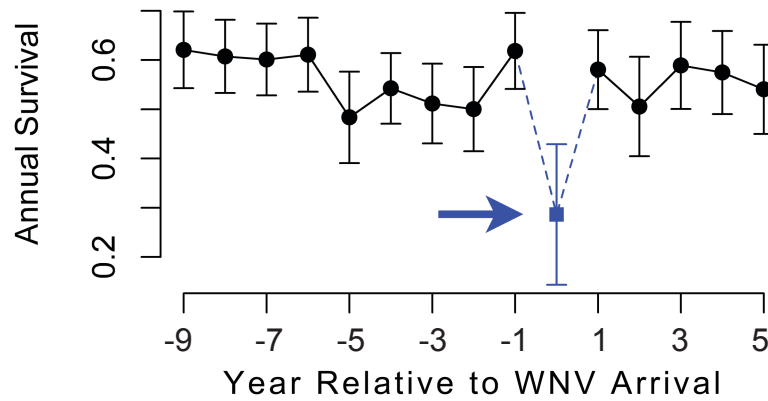

### Field Sparrow

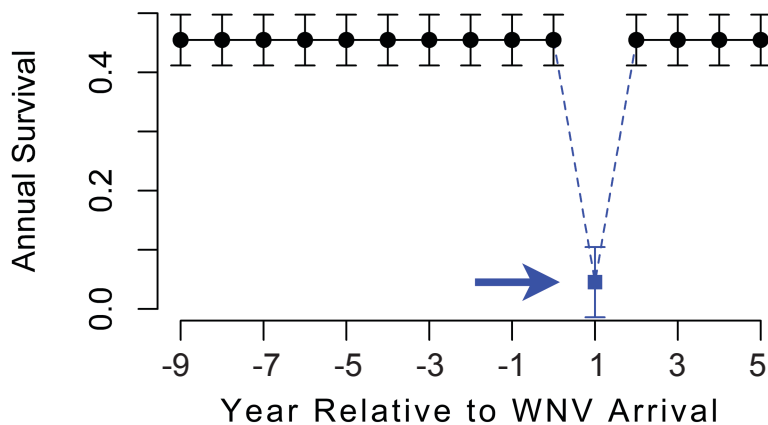

2002 - 2005

2002 -  
2003

1999 - 2001

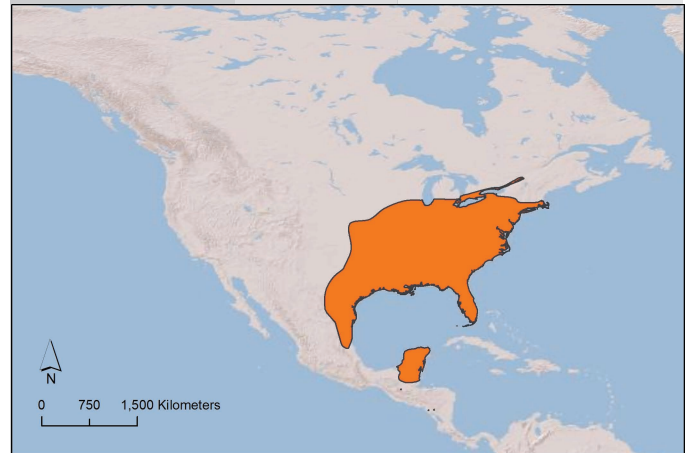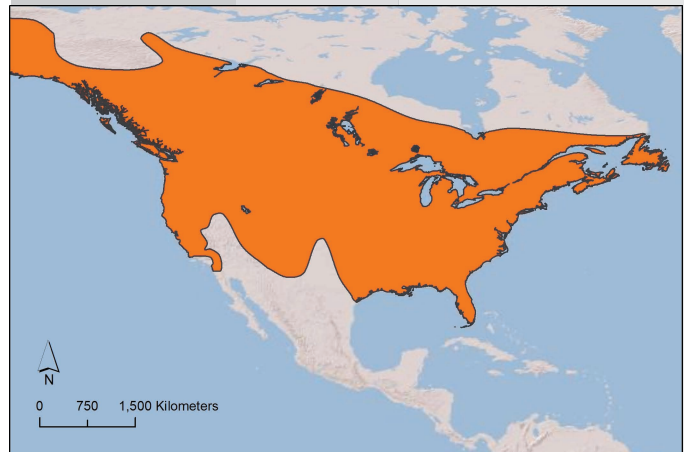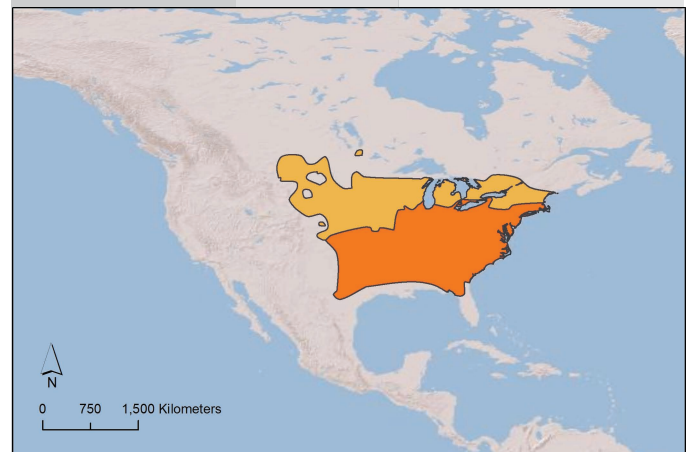

# WNV Arrival Years

## Fox Sparrow

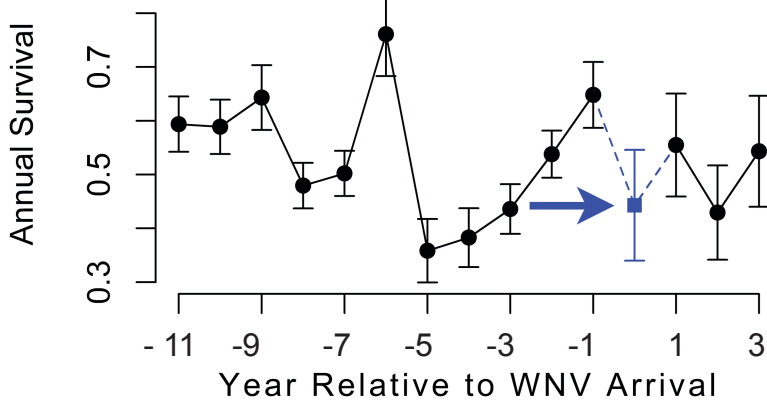

## Northern Cardinal

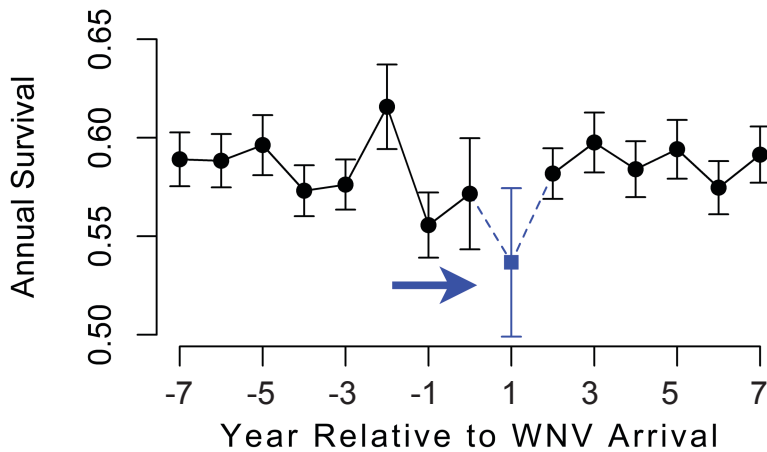

## Red-eyed Vireo

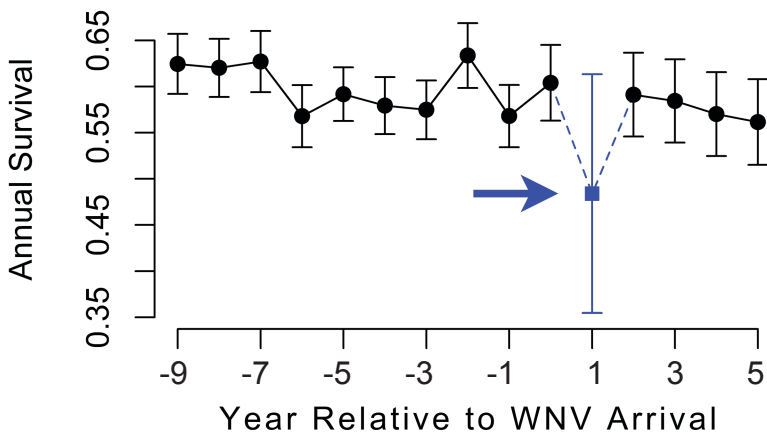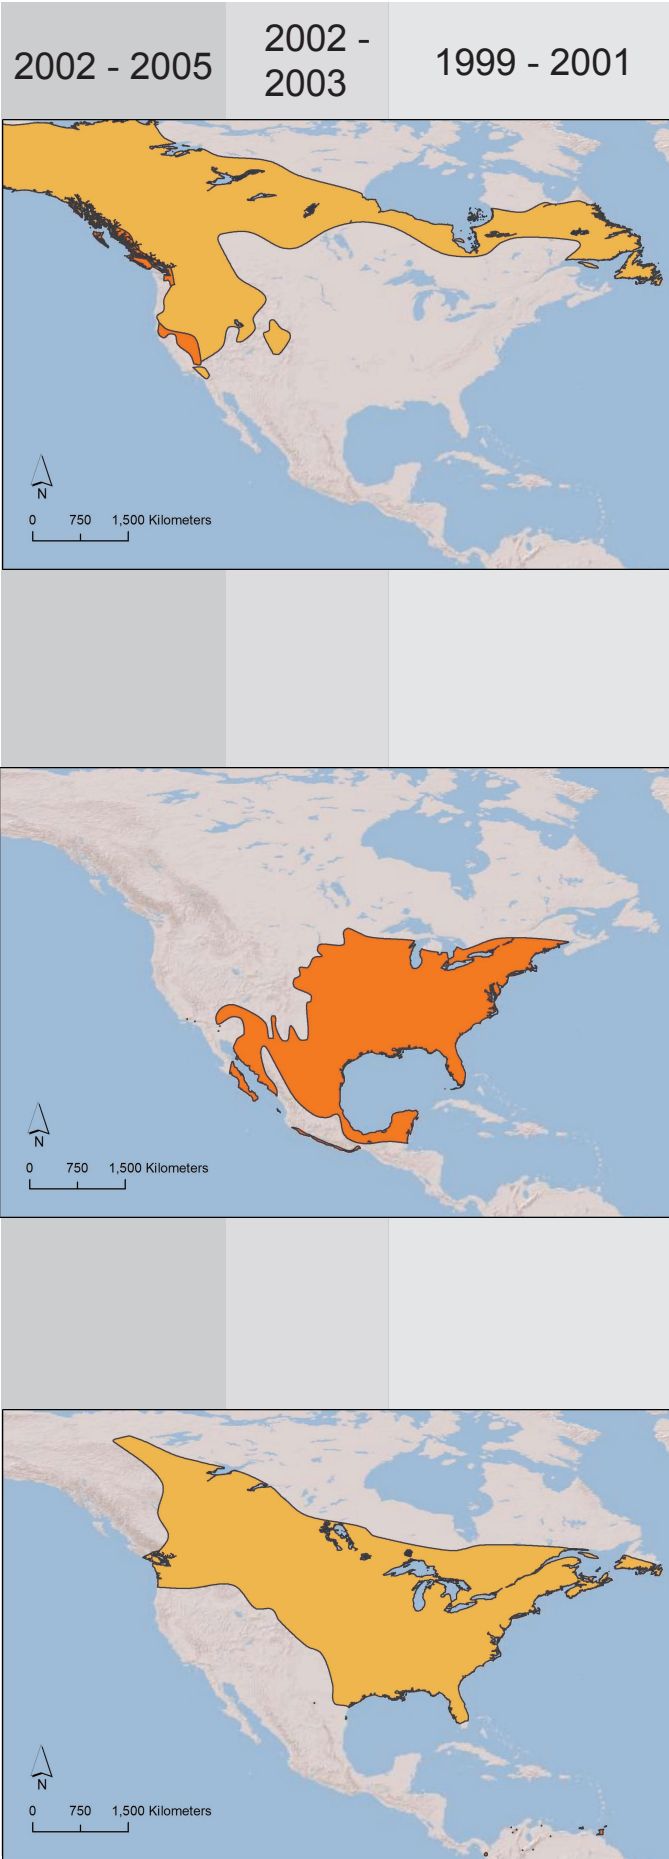

# WNV Arrival Years

## Song Sparrow

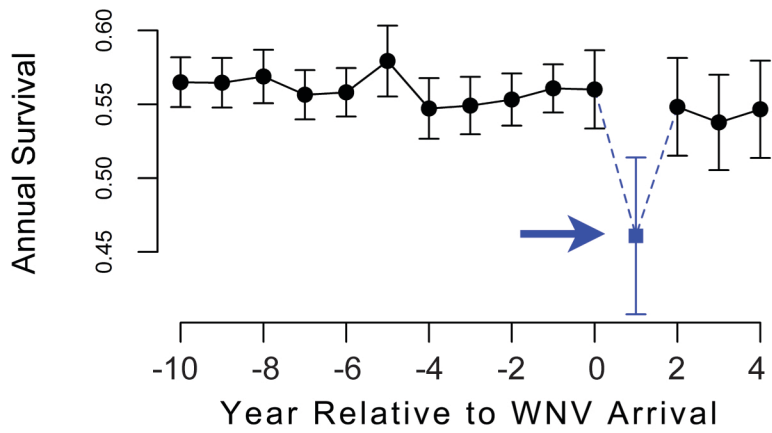

2002 - 2005

2002 -  
2003

1999 - 2001

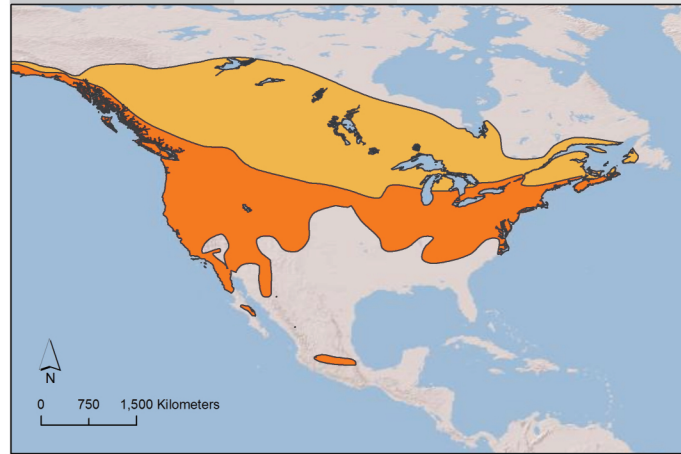

## Spotted Towhee

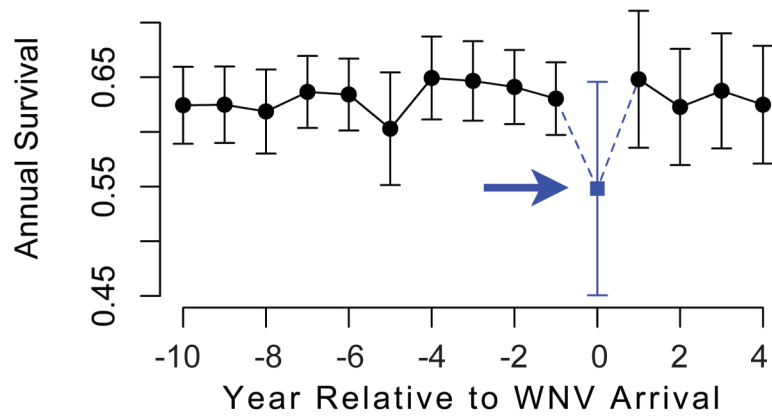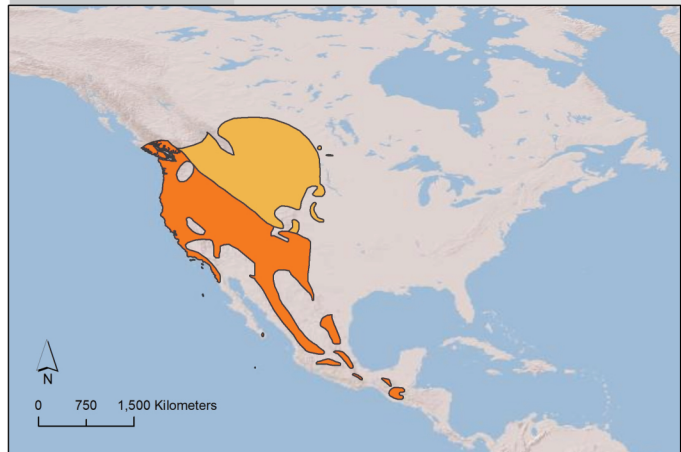

## White-eyed Vireo

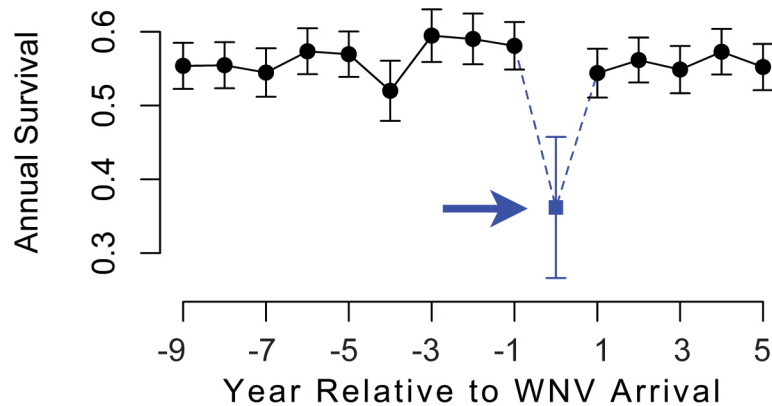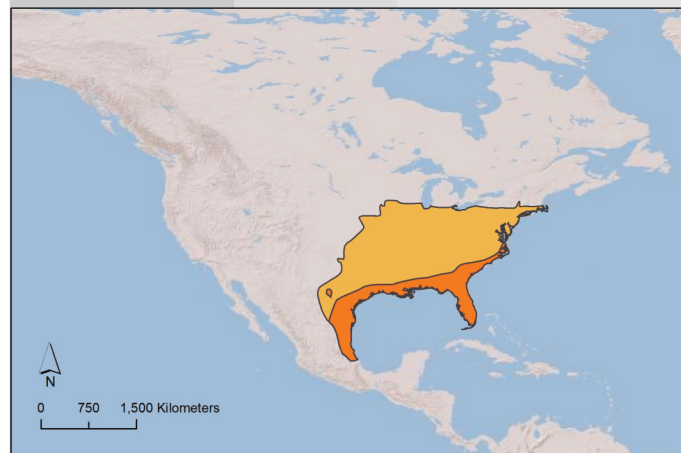

## WNV Arrival Years

### Western Wood-pewee

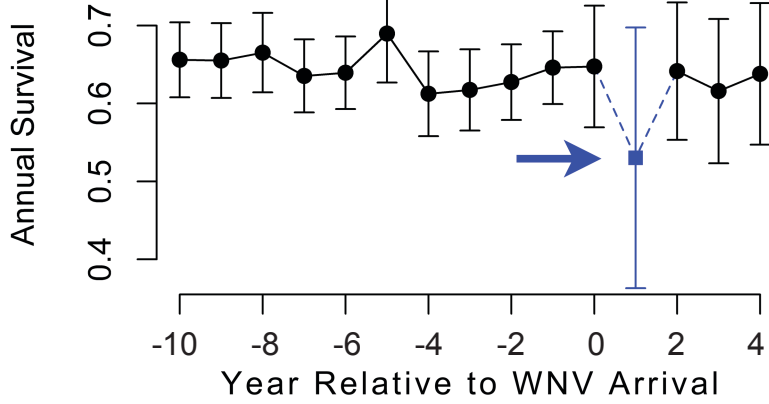

### Yellow Warbler

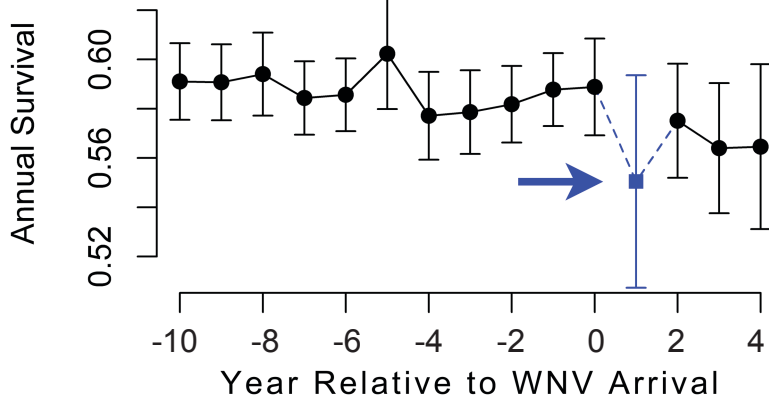

2002 - 2005

2002 -  
2003

1999 - 2001

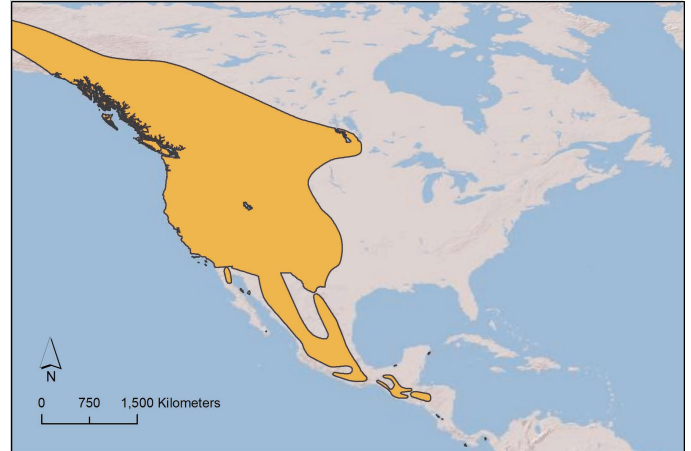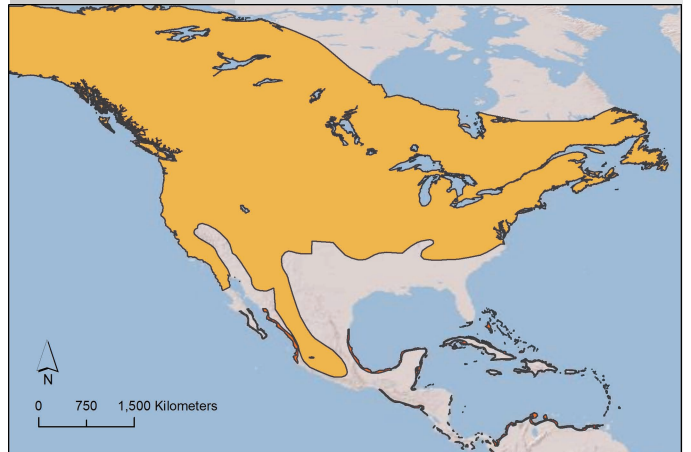

Supplement: pnas.1507747112.sfig02.pdf [file pnas.1507747112.sfig02.pdf]
